# Supplementary material for: Anionic modulation induces molecular polarity in a three-component crown ether system
Source: Royal Society of Chemistry journal article supplement (doi:10.1039/d4dt03466j), 2025-01-01
Supplement: d4dt03466j1.pdf [file d4dt03466j1.pdf]

## Supporting Information

### **Anionic modulation induces molecular polarity in a three-component crown ethers system**

Feiyan Liu, Guoyong Chen, Xiao Liu, Ting Jiang, Wenjing Guo\* Xiancai Li\*,

Zhenhong Wei\*

School of Chemistry and Chemical Engineering, Nanchang University, Nanchang

City, 330031, P.R. China

E-mail: [352800220014@email.ncu.edu.cn](mailto:352800220014@email.ncu.edu.cn); [xcli@ncu.edu.cn](mailto:xcli@ncu.edu.cn); [weizh@ncu.edu.cn](mailto:weizh@ncu.edu.cn)

## **Measurement Methods**

### **Thermal analyses.**

Differential scanning calorimetry (DSC) measurements were performed with a NETZSCH DSC 200F3 instrument. Crystalline samples underwent both heating and cooling processes at a consistent rate of 20 K min<sup>-1</sup> under aluminum crucibles and nitrogen atmosphere.

### **SHG and dielectric measurements.**

The second harmonic generation (SHG) was examined using INSTEC instruments. Complex dielectric permittivities were assessed utilizing the DMS-1000 dielectric temperature spectrum measuring system. Silver conductive paste was utilized to coat the surfaces of the samples, serving dual roles as the top and bottom electrodes.

### **Single-crystal and powder X-ray crystallography.**

X-ray single-crystal diffraction experiments were performed utilizing a Rigaku Saturn 924 diffractometer, outfitted with Mo-K $\alpha$  radiation ( $\lambda = 0.71073 \text{ \AA}$ ). X-ray diffraction (XRD) analyses were executed employing a PANalytical X'Pert3 diffractometer, equipped with a Cu K $\alpha$  X-ray source ( $\lambda = 1.5418 \text{ \AA}$ , 40 kV, 150 mA), with a scan rate set at 10° min<sup>-1</sup> for the measurements.

### **IR measurements.**

The Fourier transform infrared (FTIR) spectra were acquired employing the Bruker Alpha II instrument.

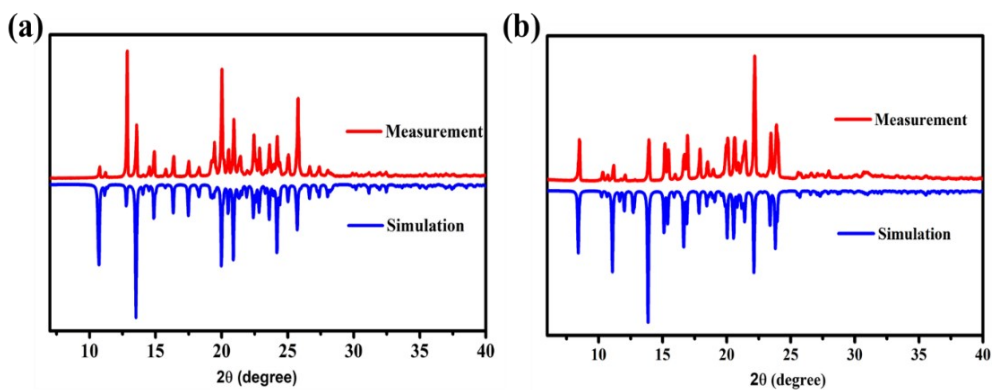

**Figure S1.** The X-ray powder diffractogram of compounds **1** (a) and **2** (b).

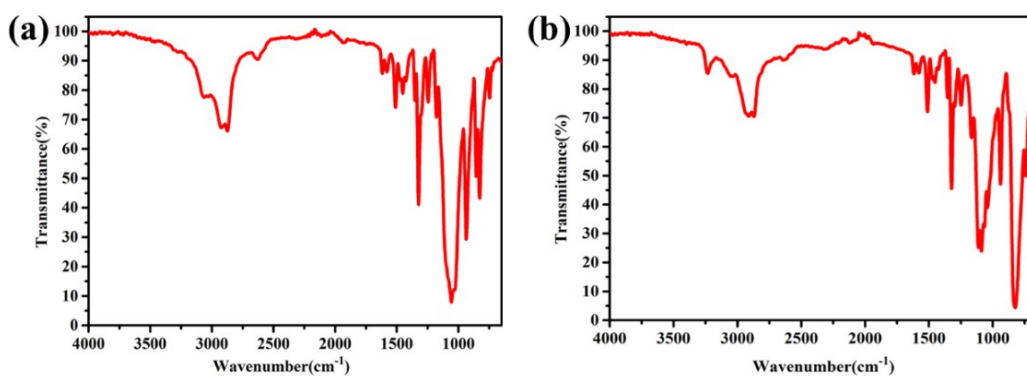

**Figure S2.** The infrared spectra of compounds **1**(a) and **2**(b).

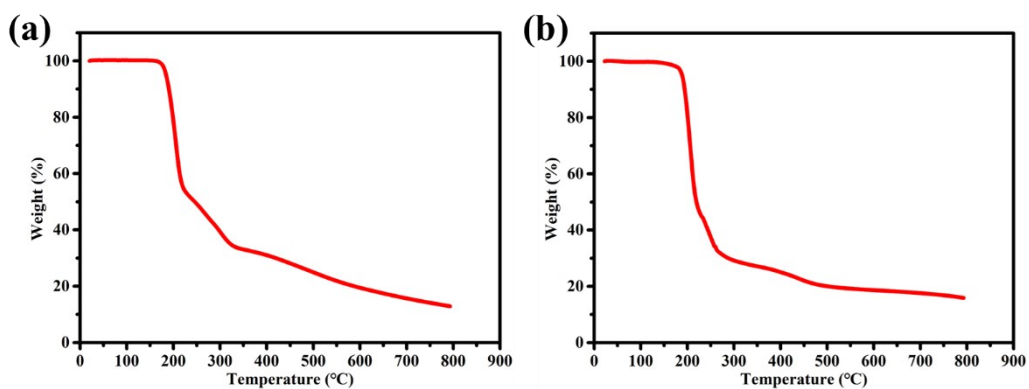

**Figure S3.** The TG analysis of compounds **1**(a) and **2**(b).

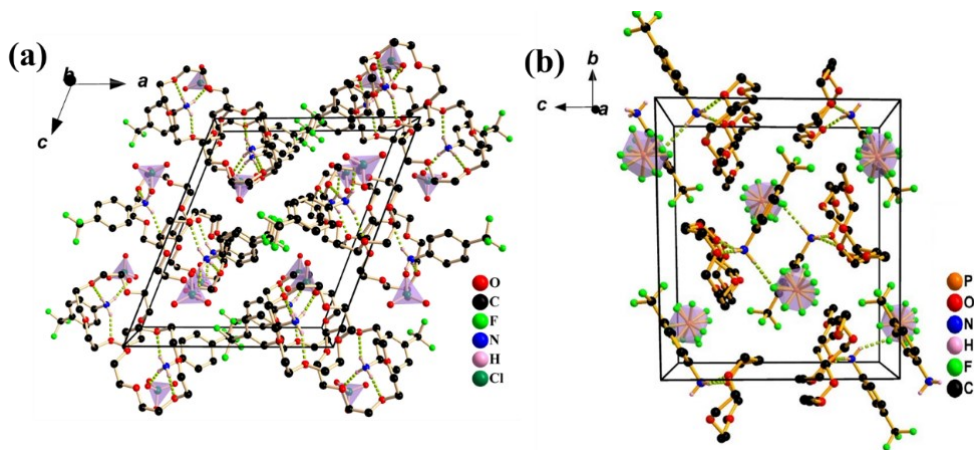

**Figure S4.** Stacking diagram of compounds 1(a) and 2 (b) at LTP.

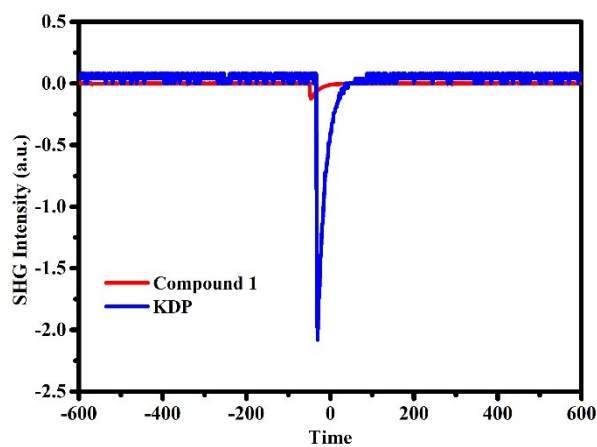

**Figure S5.** Comparison of SHG signaling of compound 1 with KDP.

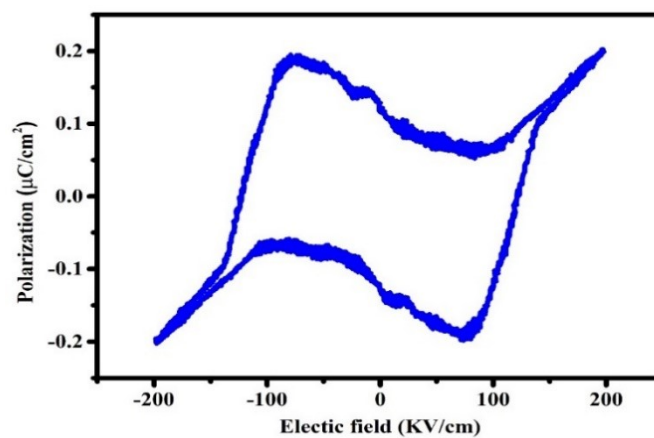

**Figure S6.** Electric hysteresis loop of 1.

**Table S1.** Crystal data and structure refinement for crystals **1**.

| Identification code                                  | <b>1</b>                                                                                      | <b>1</b>                                                                        |
|------------------------------------------------------|-----------------------------------------------------------------------------------------------|---------------------------------------------------------------------------------|
| Temperature (K)                                      | 200 K                                                                                         | 293 K                                                                           |
| Formula                                              | C <sub>34</sub> H <sub>52</sub> Cl <sub>2</sub> F <sub>6</sub> N <sub>2</sub> O <sub>18</sub> | C <sub>17</sub> H <sub>27</sub> ClF <sub>3</sub> NO <sub>9</sub>                |
| Formula weight                                       | 961.68                                                                                        | 481.85                                                                          |
| Crystal system                                       | monoclinic                                                                                    | monoclinic                                                                      |
| Space group                                          | <i>P2</i> <sub>1</sub>                                                                        | <i>P2</i> <sub>1</sub> / <i>c</i>                                               |
| <i>a</i> /Å                                          | 14.5944(5)                                                                                    | 14.9120(11)                                                                     |
| <i>b</i> /Å                                          | 9.4697(2)                                                                                     | 9.6790(5)                                                                       |
| <i>c</i> /Å                                          | 17.1687(5)                                                                                    | 16.9652(12)                                                                     |
| $\alpha$ /°                                          | 90                                                                                            | 90                                                                              |
| $\beta$ /°                                           | 111.882(4)                                                                                    | 111.895(9)                                                                      |
| $\gamma$ /°                                          | 90                                                                                            | 90                                                                              |
| Volume/Å <sup>3</sup>                                | 2201.84(13)                                                                                   | 2272.0(3)                                                                       |
| <i>Z</i>                                             | 2                                                                                             | 4                                                                               |
| <i>D</i> <sub>calc</sub> g/cm <sup>3</sup>           | 1.451                                                                                         | 1.409                                                                           |
| $\mu$ /mm <sup>-1</sup>                              | 0.246                                                                                         | 0.239                                                                           |
| <i>F</i> (000)                                       | 1004.0                                                                                        | 1008.0                                                                          |
| Radiation                                            | MoK $\alpha$ ( $\lambda$ = 0.71073)                                                           | MoK $\alpha$ ( $\lambda$ = 0.71073)                                             |
| Reflections collected                                | 37369                                                                                         | 35422                                                                           |
| Independent reflections                              | 11270 [ <i>R</i> <sub>int</sub> = 0.0323,<br><i>R</i> <sub>sigma</sub> = 0.0332]              | 7200 [ <i>R</i> <sub>int</sub> = 0.0361, <i>R</i> <sub>sigma</sub> =<br>0.0316] |
| Goodness-of-fit                                      | 1.085                                                                                         | 1.924                                                                           |
| Final <i>R</i> indexes [ <i>I</i> ≥ 2σ ( <i>I</i> )] | <i>R</i> <sub>1</sub> = 0.0546, <i>wR</i> <sub>2</sub> = 0.1581                               | <i>R</i> <sub>1</sub> = 0.1972, <i>wR</i> <sub>2</sub> = 0.4990                 |
| Final <i>R</i> indexes [all data]                    | <i>R</i> <sub>1</sub> = 0.0683,<br><i>wR</i> <sub>2</sub> = 0.1684                            | <i>R</i> <sub>1</sub> = 0.2612,<br><i>wR</i> <sub>2</sub> = 0.5429              |
| Flack parameter                                      | 0.23(2)                                                                                       | /                                                                               |

**Table S2.** The hydrogen bond length [ $\text{\AA}$ ] and bond angle [ $^\circ$ ] in compound **1**.

|             | D-H $\cdots$ A      | D-H [ $\text{\AA}$ ] | H-A [ $\text{\AA}$ ] | D-A [ $\text{\AA}$ ] | D-H $\cdots$ A [ $^\circ$ ] |
|-------------|---------------------|----------------------|----------------------|----------------------|-----------------------------|
|             | N1-H1C $\cdots$ O6  | 0.91                 | 2.54                 | 3.134 (5)            | 124                         |
|             | N1-H1C $\cdots$ O9  | 0.91                 | 2.04                 | 2.916 (4)            | 161                         |
|             | N1-H1D $\cdots$ O2  | 0.91                 | 1.93                 | 2.819 (4)            | 165                         |
|             | N1-H1D $\cdots$ O3  | 0.91                 | 2.45                 | 2.972 (4)            | 117                         |
|             | N1-H1E $\cdots$ O4  | 0.91                 | 2.13                 | 2.983 (4)            | 156                         |
| <b>200K</b> | N1-H1E $\cdots$ O5  | 0.91                 | 2.30                 | 2.927 (4)            | 126                         |
|             | N1-H2C $\cdots$ O11 | 0.91                 | 2.05                 | 2.901 (4)            | 154                         |
|             | N2-H2C $\cdots$ O12 | 0.91                 | 2.43                 | 3.085 (4)            | 129                         |
|             | N2-H2D $\cdots$ O10 | 0.91                 | 2.43                 | 2.888 (4)            | 112                         |
|             | N2-H2D $\cdots$ O13 | 0.91                 | 2.57                 | 2.894 (5)            | 102                         |
|             | N2-H2D $\cdots$ O14 | 0.91                 | 1.94                 | 2.842 (4)            | 170                         |
|             | N2-H2E $\cdots$ O17 | 0.91                 | 1.99                 | 2.889 (6)            | 171                         |
|             | N1-H1A $\cdots$ O7  | 0.89                 | 2.48                 | 2.963 (11)           | 114                         |
|             | N1-H1A $\cdots$ O8  | 0.89                 | 1.95                 | 2.805(8)             | 161                         |
|             | N1-H1B $\cdots$ O5  | 0.89                 | 2.18                 | 2.913 (9)            | 140                         |
| <b>293K</b> | N1-H1B $\cdots$ O6  | 0.89                 | 2.27                 | 3.031 (9)            | 144                         |
|             | N1-H1E $\cdots$ O3  | 0.89                 | 2.05                 | 2.937(12)            | 172                         |
|             | N1-H1E $\cdots$ O3A | 0.89                 | 2.19                 | 2.990 (13)           | 149                         |

**Table S3.** Selected bond lengths [ $\text{\AA}$ ] and bond angles [ $^\circ$ ] for **1**.

| <b>1</b> at 200K |           |             |           |
|------------------|-----------|-------------|-----------|
| C12—O15          | 1.384(4)  | C12—O16     | 1.446(4)  |
| C12—O17          | 1.449(4)  | C12—O18     | 1.408(4)  |
| C11—O6           | 1.412(4)  | C11—O7      | 1.382(6)  |
| C11—O8           | 1.420(6)  | C11—O9      | 1.431(3)  |
| O6—C11—O8        | 107.7(4)  | O6—C11—O9   | 110.4(2)  |
| O7—C11—O6        | 111.3(4)  | O7—C11—O8   | 107.6(5)  |
| O7—C11—O9        | 111.8(4)  | O8—C11—O9   | 108.0(3)  |
| O15—C12—O16      | 104.5(4)  | O15—C12—O17 | 110.6(3)  |
| O15—C12—O18      | 112.4(3)  | O16—C12—O17 | 105.7(3)  |
| O18—C12—O16      | 109.5(3)  | O18—C12—O17 | 113.5(3)  |
| <b>1</b> at 296K |           |             |           |
| C11—O1           | 1.307(10) | C11—O2      | 1.405(10) |
| C11—O3           | 1.338(9)  | C11—O4      | 1.413(10) |
| C11—O1A          | 1.380(12) | C11—O2A     | 1.317(11) |
| C11—O3A          | 1.467(10) | C11—O4A     | 1.362(12) |
| N1—C7            | 1.455(6)  | O1—C11—O2   | 111.6(6)  |
| O1—C11—O3        | 115.1(6)  | O1—C11—O4   | 109.8(6)  |
| O2—C11—O4        | 102.9(6)  | O3—C11—O2   | 108.8(6)  |
| O3—C11—O4        | 107.9(5)  | O1A—C11—O3A | 103.6(6)  |
| O2A—C11—O1A      | 113.9(6)  | O2A—C11—O3A | 108.0(6)  |
| O2A—C11—O4A      | 115.0(6)  | O4A—C11—O1A | 111.2(7)  |
| O4A—C11—O3A      | 104.0(6)  |             |           |

**Table S4.** Crystal data and structure refinement for crystals **2**.

|                     |          |
|---------------------|----------|
| Identification code | <b>2</b> |
| Temperature (K)     | 200 K    |

|                                                              |                                                                                 |
|--------------------------------------------------------------|---------------------------------------------------------------------------------|
| Formula                                                      | C <sub>17</sub> H <sub>27</sub> F <sub>9</sub> NO <sub>5</sub> P                |
| Formula weight                                               | 527.37                                                                          |
| Crystal system                                               | monoclinic                                                                      |
| Space group                                                  | <i>P</i> 2 <sub>1</sub> / <i>n</i>                                              |
| <i>a</i> /Å                                                  | 10.5818(4)                                                                      |
| <i>b</i> /Å                                                  | 15.9181(6)                                                                      |
| <i>c</i> /Å                                                  | 13.8015(5)                                                                      |
| $\alpha$ /°                                                  | 90                                                                              |
| $\beta$ /°                                                   | 93.642(3)                                                                       |
| $\gamma$ /°                                                  | 90                                                                              |
| Volume/Å <sup>3</sup>                                        | 2320.06(15)                                                                     |
| <i>Z</i>                                                     | 4                                                                               |
| <i>D</i> <sub>calc</sub> g/cm <sup>3</sup>                   | 1.510                                                                           |
| $\mu$ /mm <sup>-1</sup>                                      | 0.219                                                                           |
| <i>F</i> (000)                                               | 1088.0                                                                          |
| Radiation                                                    | MoK $\alpha$ ( $\lambda$ = 0.71073)                                             |
| Reflections collected                                        | 28272                                                                           |
| Independent reflections                                      | 6169 [ <i>R</i> <sub>int</sub> = 0.0419,<br><i>R</i> <sub>sigma</sub> = 0.0390] |
| Goodness-of-fit                                              | 1.071                                                                           |
| Final <i>R</i> indexes [ <i>I</i> ≥ 2 $\sigma$ ( <i>I</i> )] | <i>R</i> <sub>1</sub> = 0.0724, <i>wR</i> <sub>2</sub> = 0.1939                 |
| Final <i>R</i> indexes<br>[all data]                         | <i>R</i> <sub>1</sub> = 0.1027,<br><i>wR</i> <sub>2</sub> = 0.2116              |

**Table S5.** The hydrogen bond length [Å] and bond angle [°] in compound **2**.

| D-H···A     | D–H [Å] | H–A [Å] | D–A [Å]   | D–H···A [°] |
|-------------|---------|---------|-----------|-------------|
| N1-H1C···O2 | 0.91    | 2.49    | 2.910 (3) | 108         |



---

|             |              |      |      |            |     |
|-------------|--------------|------|------|------------|-----|
|             | N1-H1C···O3  | 0.91 | 1.93 | 2.836 (3)  | 173 |
|             | N1-H1C···O4  | 0.91 | 2.56 | 2.963 (3)  | 107 |
|             | N1-H1D···F3A | 0.91 | 2.37 | 3.130 (6)  | 142 |
| <b>200K</b> | N1-H1D···F4A | 0.91 | 2.16 | 2.959 (6)  | 146 |
|             | N1- H1D···F2 | 0.91 | 2.08 | 2.983 (11) | 174 |
|             | N1- H1D···F3 | 0.91 | 2.44 | 3.073 (9)  | 127 |
|             | N1- H1E···O1 | 0.91 | 2.36 | 2.894 (3)  | 118 |
|             | N1- H1E···O5 | 0.91 | 2.02 | 2.886 (3)  | 163 |

---

**Table S6.** Selected bond lengths [ $\text{\AA}$ ] and bond angles [ $^\circ$ ] for **2**.

| <b>2</b> at 200K |          |            |          |
|------------------|----------|------------|----------|
| P1—F1            | 1.521(7) | P1—F2      | 1.509(6) |
| P1—F3            | 1.714(6) | P1—F4      | 1.648(9) |
| P1—F5            | 1.475(9) | P1—F6      | 1.482(9) |
| P1—F1A           | 1.590(4) | P1—F2A     | 1.696(3) |
| P1—F3A           | 1.585(3) | P1—F4A     | 1.572(4) |
| P1—F5A           | 1.568(4) | P1—F6A     | 1.559(6) |
| F1—P1—F4         | 162.3(6) | F1—P1—F3   | 81.4(5)  |
| F2—P1—F1         | 95.5(6)  | F2—P1—F3   | 84.3(5)  |
| F2—P1—F4         | 83.3(6)  | F4—P1—F3   | 80.9(5)  |
| F5—P1—F1         | 105.4(7) | F5—P1—F2   | 112.0(7) |
| F5—P1—F3         | 161.1(7) | F5—P1—F4   | 91.3(6)  |
| F5—P1—F6         | 109.1(7) | F6—P1—F1   | 104.2(6) |
| F6—P1—F2         | 127.1(6) | F6—P1—F3   | 52.0(6)  |
| F6—P1—F4         | 63.8(7)  | F6A—P1—F1A | 74.9(4)  |
| F6A—P1—F2A       | 157.2(3) | F6A—P1—F3A | 100.9(4) |
| F6A—P1—F4A       | 115.6(4) | F6A—P1—F5A | 89.3(4)  |
| F5A—P1—F1A       | 98.4(3)  | F5A—P1—F2A | 84.8(3)  |
| F5A—P1—F3A       | 168.9(3) | F5A—P1—F4A | 85.5(3)  |
| F4A—P1—F1A       | 169.0(3) | F4A—P1—F2A | 86.0(2)  |
| F4A—P1—F3A       | 86.1(3)  | F3A—P1—F1A | 88.7(3)  |
| F3A—P1—F2A       | 87.4(2)  | F1A—P1—F2A | 84.1(2)  |
